# Supplementary material for: Morphological features of coronary plaques in WHHLMI rabbits (Oryctolagus cuniculus), an animal model for familial hypercholesterolemia
Source: PubMed Central journal article supplement — Exp Anim. 2016 Dec 27;66(2):145–57. doi: 10.1538/expanim.16-0078 (PMC5411301; doi:10.1538/expanim.16-0078), 2016-12-27
Supplement: expanim-66-145-s001.pdf [file expanim-66-145-s001.pdf]

Supplemental Table 1. Rabbits examined in this study

|                                 | 10-16 months old |       | 17-22 months old |       | 23-29 months old |       | Total           |       |
|---------------------------------|------------------|-------|------------------|-------|------------------|-------|-----------------|-------|
|                                 | Females          | Males | Females          | Males | Females          | Males | Females         | Males |
| Sacrificed rabbits              | 26               | 37    | 15               | 16    | 8                | 5     | 49              | 58    |
| Sudden death                    | 20               | 1     | 18               | 8     | 26               | 7     | 64              | 16    |
| Total                           | 46               | 38    | 33               | 24    | 34               | 12    | 113             | 74    |
| % of sudden death               | 43.5%            | 2.6%  | 54.5%            | 33.3% | 76.5%            | 58.3% | 56.6%           | 21.6% |
| Fisher's exact probability test | <i>P</i> <0.001  |       | <i>P</i> =0.178  |       | <i>P</i> =0.276  |       | <i>P</i> <0.001 |       |

The frequency of rabbits that died suddenly (females + males) was significantly increased with aging (*P*=0.008) according to the Cochran-Mantel-Haenszel test, although the age-related increase in the frequency was not statistically significant in analysis using either only females or males when analyzed independently.

Supplemental Table 2. Gender differences in degree of coronary lesions

| Months old                     | Frequency of sections with lesion (%) |                |                | Frequency of sections with >75% stenosis (%) |                |                | Maximum stenosis (%) |                |                |
|--------------------------------|---------------------------------------|----------------|----------------|----------------------------------------------|----------------|----------------|----------------------|----------------|----------------|
|                                | 10-16                                 | 17-22          | 23-29          | 10-16                                        | 17-22          | 23-29          | 10-16                | 17-22          | 23-29          |
| Rabbits that had died suddenly |                                       |                |                |                                              |                |                |                      |                |                |
| Female                         | 81 ± 4.3                              | 91 ± 2.9       | 85 ± 2.6       | 54 ± 4.8                                     | 67 ± 2.9       | 61 ± 3.0       | 94 ± 0.8             | 95 ± 0.0       | 94 ± 0.3       |
| Male                           | 81                                    | 95 ± 2.0       | 95 ± 2.2       | 37                                           | 69 ± 3.8       | 71 ± 6.6       | 95                   | 95 ± 0.0       | 94 ± 0.9       |
|                                |                                       | <i>P=0.501</i> | <i>P=0.067</i> |                                              | <i>P=1.000</i> | <i>P=0.226</i> |                      | <i>ns</i>      | <i>P=0.272</i> |
| Rabbits sacrificed             |                                       |                |                |                                              |                |                |                      |                |                |
| Female                         | 60 ± 5.7                              | 76 ± 3.9       | 73 ± 8.0       | 26 ± 6.4                                     | 29 ± 5.6       | 44 ± 9.5       | 75 ± 4.0             | 79 ± 6.9       | 93 ± 0.9       |
| Male                           | 49 ± 3.8                              | 77 ± 5.8       | 46 ± 11        | 13 ± 2.9                                     | 24 ± 5.4       | 20 ± 5.2       | 67 ± 4.4             | 87 ± 1.9       | 85 ± 3.5       |
|                                | <i>P=0.150</i>                        | <i>P=0.676</i> | <i>P=0.028</i> | <i>P=0.169</i>                               | <i>P=0.752</i> | <i>P=0.057</i> | <i>P=0.305</i>       | <i>P=0.984</i> | <i>P=0.042</i> |

Frequency was calculated by dividing the number of sections with the respective lesions or more than 75% stenosis by the number of sections examined. Statistical analyses were performed with the Mann-Whitney U-test. ns, not significant

Supplemental Table 3. Gender differences in lesion types

| Months old                     | Early fatty streaks       |                |                | Fibrous lesion  |                   |                   | Fibroatheroma  |                   |                   |
|--------------------------------|---------------------------|----------------|----------------|-----------------|-------------------|-------------------|----------------|-------------------|-------------------|
|                                | 10-16                     | 17-22          | 23-29          | 10-16           | 17-22             | 23-29             | 10-16          | 17-22             | 23-29             |
| Rabbits that had died suddenly |                           |                |                |                 |                   |                   |                |                   |                   |
| Female                         | 1.5% (13/868)             | 0.4% (3/691)   | 1.0% (9/873)   | 29% (247/868)   | 36% (246/691)     | 41% (359/873)     | 24% (207/868)  | 39% (266/691)     | 38% (327/873)     |
| Male                           | 4.7% (2/43)               | 0.4% (1/254)   | 0.4% (1/223)   | 42% (18/43)     | 37% (94/254)      | 56% (125/223)     | 35% (15/43)    | 45% (114/254)     | 26% (57/223)      |
|                                | <i>P=0.155</i>            | <i>P=1.000</i> | <i>P=0.697</i> | <i>P=0.836</i>  | <i>P=0.703</i>    | <i>P&lt;0.001</i> | <i>P=0.104</i> | <i>P=0.085</i>    | <i>P&lt;0.001</i> |
| Rabbits sacrificed             |                           |                |                |                 |                   |                   |                |                   |                   |
| Female                         | 2.5% (31/1263)            | 0.7% (5/721)   | 2.0% (8/407)   | 23% (289/1263)  | 14% (103/721)     | 34% (139/407)     | 11% (143/1263) | 22% (156/721)     | 19% (78/407)      |
| Male                           | 1.6% (26/1607)            | 1.4% (13/957)  | 0.5% (1/185)   | 22% (350/1607)  | 8.8% (84/957)     | 19% (35/185)      | 10% (162/1607) | 14% (129/957)     | 7.0% (13/185)     |
|                                | <i>P=0.138</i>            | <i>P=0.235</i> | <i>P=0.286</i> | <i>P=0.498</i>  | <i>P&lt;0.001</i> | <i>P&lt;0.001</i> | <i>P=0.300</i> | <i>P&lt;0.001</i> | <i>P&lt;0.001</i> |
| Months old                     | Thin-capped fibroatheroma |                |                | Advanced lesion |                   |                   |                |                   |                   |
|                                | 10-16                     | 17-22          | 23-29          | 10-16           | 17-22             | 23-29             |                |                   |                   |
| Rabbits that had died suddenly |                           |                |                |                 |                   |                   |                |                   |                   |
| Female                         | 3.2% (28/868)             | 6.8% (47/691)  | 3.1% (27/873)  | 1.3% (11/868)   | 2.5% (17/691)     | 3.7% (32/873)     |                |                   |                   |
| Male                           | 0% (0/43)                 | 5.1% (13/254)  | 4.0% (9/223)   | 0% (0/43)       | 1.2% (3/254)      | 4.0% (9/223)      |                |                   |                   |
|                                | <i>P=0.638</i>            | <i>P=0.452</i> | <i>P=0.527</i> | <i>P=1.000</i>  | <i>P=0.310</i>    | <i>P=0.843</i>    |                |                   |                   |
| Rabbits sacrificed             |                           |                |                |                 |                   |                   |                |                   |                   |
| Female                         | 1.0% (13/1263)            | 1.4% (10/721)  | 0.7% (3/407)   | 0.2% (2/1263)   | 0.6% (4/721)      | 4.4% (18/407)     |                |                   |                   |
| Male                           | 1.3% (21/1607)            | 1.4% (13/957)  | 1.6% (3/185)   | 0.1% (1/1607)   | 0.3% (3/957)      | 0% (0/185)        |                |                   |                   |
|                                | <i>P=0.603</i>            | <i>P=1.000</i> | <i>P=0.383</i> | <i>P=0.586</i>  | <i>P=0.472</i>    | <i>P=0.001</i>    |                |                   |                   |

Frequency was calculated by dividing the number of sections showing each property by the number of sections examined. Statistical analyses were performed with Fisher's exact probability. Values in parentheses represent (number of sections showing each lesion type)/(number of examined sections).

(A) Age-dependent changes in sections with lesions

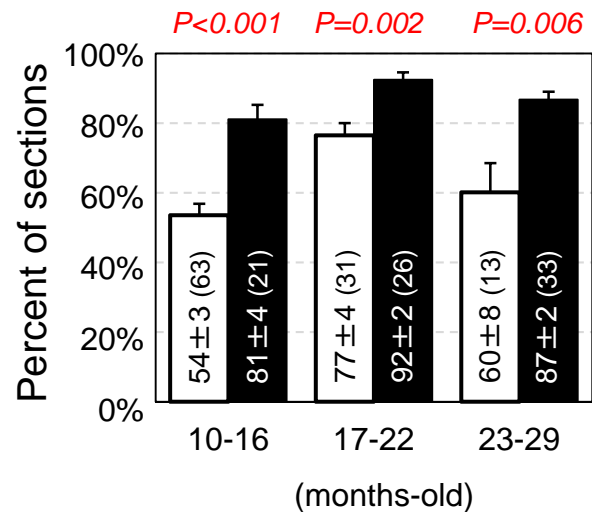

(B) Age-dependent changes in sections with >75% stenosis

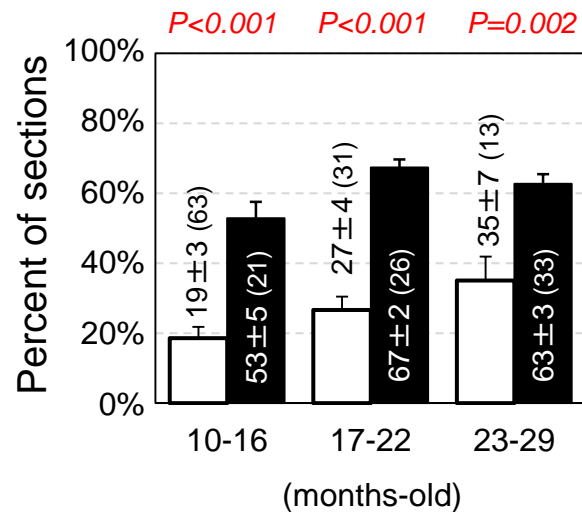

(C) Age-dependent changes in maximum coronary stenosis

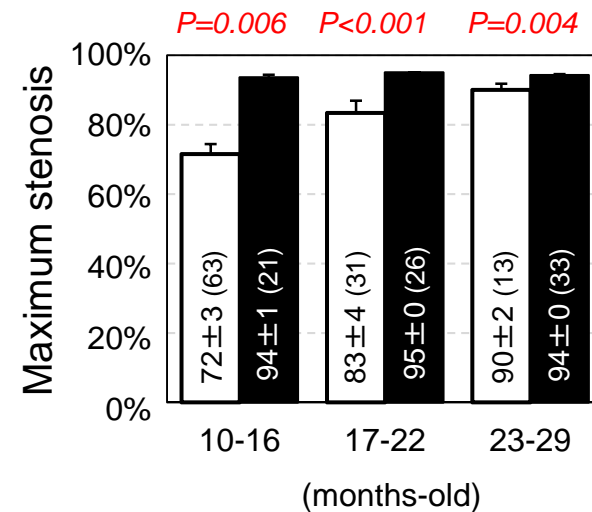

**Supplemental Figure 1**

Comparison of progression of coronary lesions between euthanized rabbits (open columns) and rabbits that had died suddenly (black columns). A total of 8,092 sections in 5,200 segments from 187 rabbits were observed. We analyzed 84 rabbits aged 10-16 months old, 57 rabbits aged 17-22 months old, and 46 rabbits aged 23-29 months old. Frequency was calculated by dividing the number of sections with the respective lesions or more than 75% stenosis by the number of sections examined. Values in parentheses represent number of rabbits examined. Statistical analyses were performed with the Mann-Whitney U-test. Bars indicate the standard error of the mean.

Frequency of sections with each lesion type

(A) Fatty streak

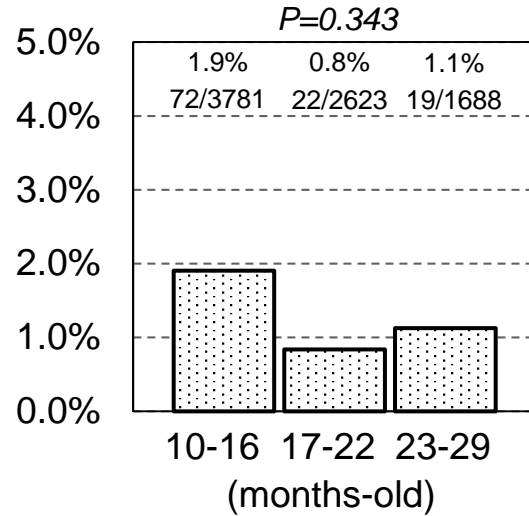

(B) Fibrous plaque

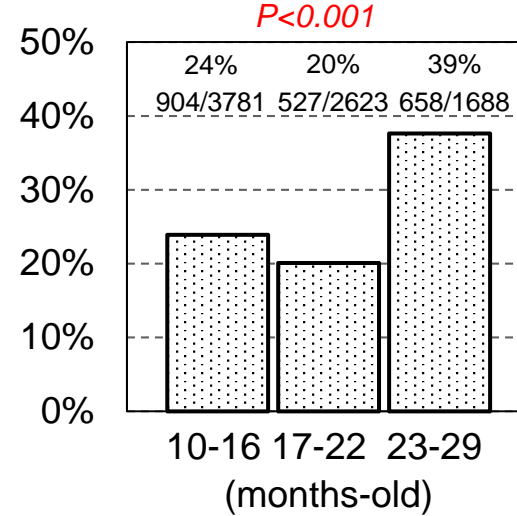

(C) Fibroatheroma

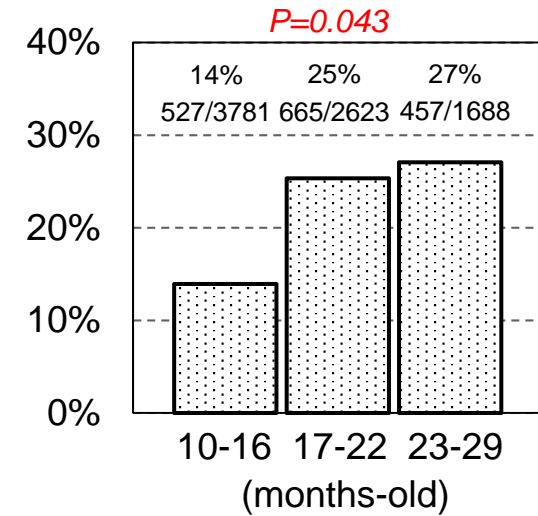

(D) Thin-capped fibroatheroma

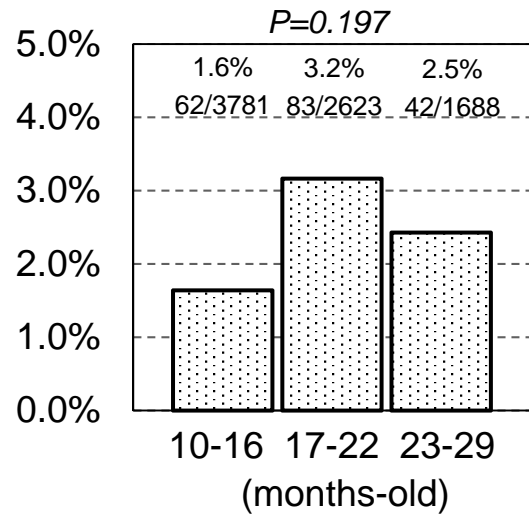

(E) Advanced plaque

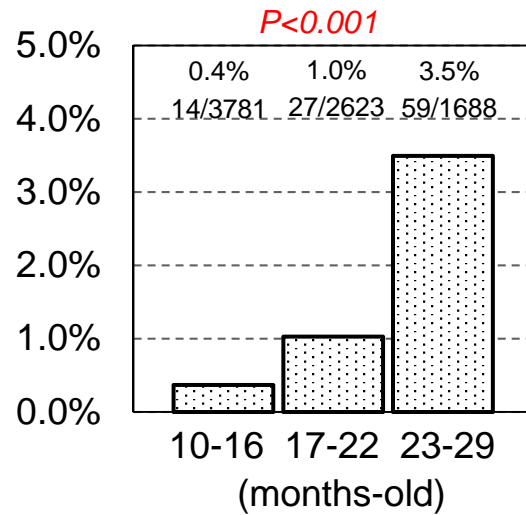

**Supplemental Figure 2**

Frequency of various types of atherosclerotic lesions in coronary arteries observed in WHHLM1 rabbits including both euthanized rabbits and rabbits that had died suddenly. A total of 8,092 sections in 5,200 segments from 187 rabbits were observed. We analyzed 84 rabbits aged 10-16 months old, 57 rabbits aged 17-22 months old, and 46 rabbits aged 23-29 months old. Frequency was calculated by dividing the number of sections with the respective lesions or more than 75% stenosis by the number of sections examined. Statistical analyses were performed with the Mantel-Haenszel test.

Frequency of sections with each lesion type

(A) Early fatty streak

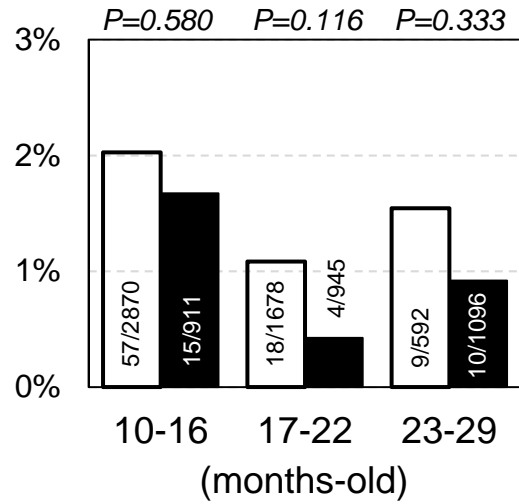

(B) Fibrous lesion

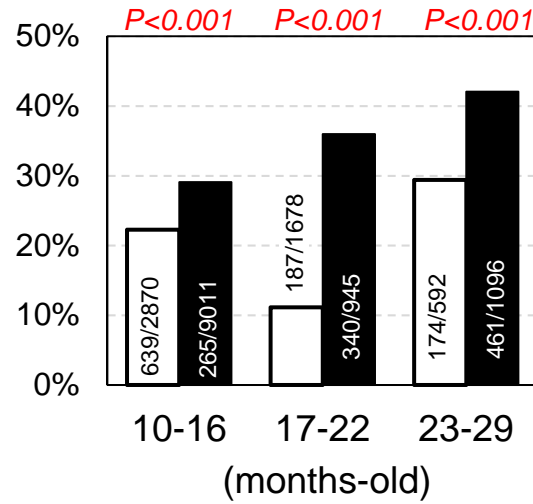

(C) Fibroatheroma

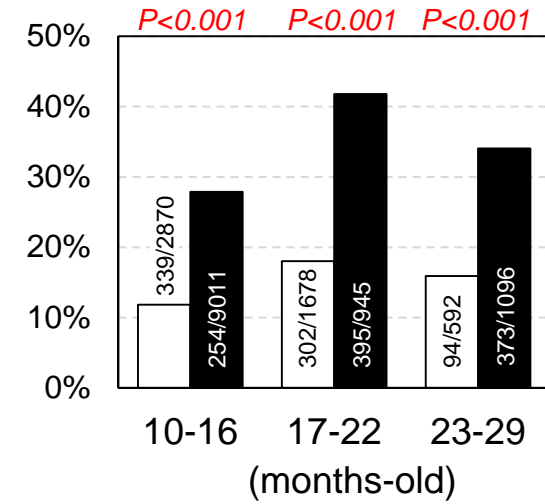

(D) Thin-capped fibroatheroma

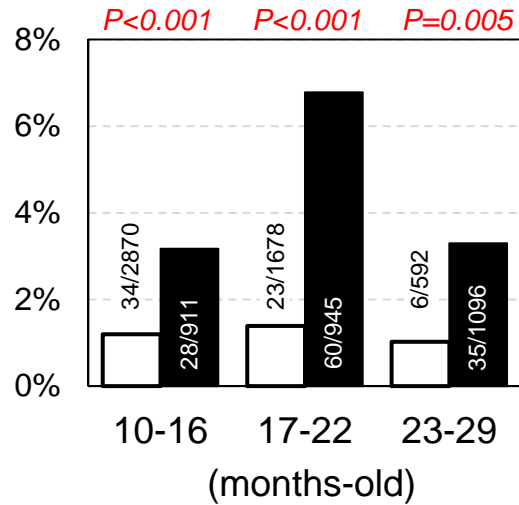

(E) Advanced lesion

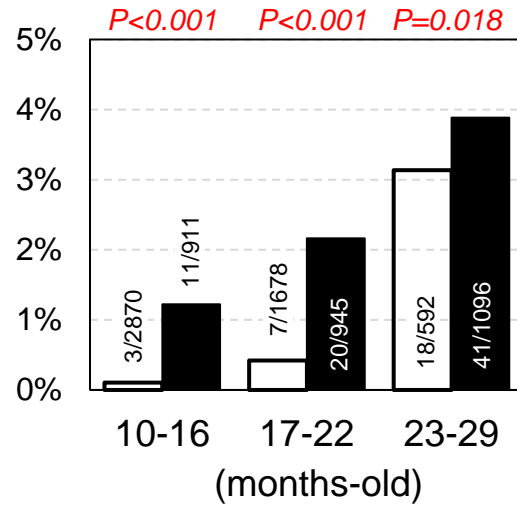

**Supplemental Figure 3**

Comparison of the frequency of each lesion type between euthanized rabbits (open columns) and rabbits that had died suddenly (black columns). Frequency was calculated by dividing the number of sections showing each property by the number of sections examined. Statistical analyses were performed with Fisher's exact probability test.
